# Supplementary material for: Prognostic immunogenic characteristics of iron pendant disease modifiers in colon cancer
Source: Front Immunol. 2023 May 25;14:1100725. doi: 10.3389/fimmu.2023.1100725 (PMC10251496; doi:10.3389/fimmu.2023.1100725)
Supplement: Supplementary file 1 [file Table_1.xlsx]

## Sheet: Sheet1
Symbol
SLC7A11
GPX4
AKR1C1
AKR1C2
AKR1C3
GPX4
RB1
HSPB1
HSF1
SLC7A11
GPX4
GCLC
SLC7A11
NFE2L2
SQSTM1
NQO1
HMOX1
FTH1
MUC1
SLC3A2
MT1G
NFE2L2
SLC40A1
SLC7A11
GPX4
SLC7A11
CISD1
SLC7A11
FANCD2
GPX4
NFE2L2
FTMT
HSPA5
ATF4
SLC7A11
GPX4
GPX4
HMOX1
ATF4
NFE2L2
TP53
SLC7A11
HELLS
SCD
FADS2
SRC
STAT3
NFE2L2
PML
MTOR
NFS1
TP63
SLC7A11
TP53
CDKN1A
MIR137
SLC40A1
GPX4
GPX4
ENPP2
VDAC2
FH
CISD2
SLC40A1
MIR9-1
MIR9-2
MIR9-3
CBS
NFE2L2
SQSTM1
GPX4
ISCU
FTH1
ACSL3
OTUB1
CD44
LINC00336
STAT3
BRD4
PRDX6
MIR17
SCD
SESN2
NF2
ARNTL
HIF1A
JUN
CA9
HSPA5
TMBIM4
HSPA5
PLIN2
MIR212
Fer1HCH
AIFM2
AIFM2
LAMP2
ZFP36
GPX4
PROM2
CHMP5
CHMP6
AKR1C1
AKR1C2
AKR1C3
CBS
NFE2L2
CAV1
GCH1
